# Supplementary material for: Electrospun flexible self-standing γ-alumina fibrous membranes and their potential as high-efficiency fine particulate filtration media
Source: Royal Society of Chemistry journal article supplement (doi:10.1039/c4ta01770f), 2014-01-01
Supplement: c4ta01770f1.pdf [file c4ta01770f1.pdf]

Electronic Supplementary Information for

## Electrospun flexible self-standing $\gamma$ -alumina fibrous membranes and their potential as high efficiency fine particulate filtration media

Yan Wang, Wei Li, Yuguo Xia, Xiuling Jiao\* and Dairong Chen\*

School of Chemistry & Chemical Engineering, National Engineering Research Center for colloidal materials, Shandong University, Jinan 250100, P.R. China.

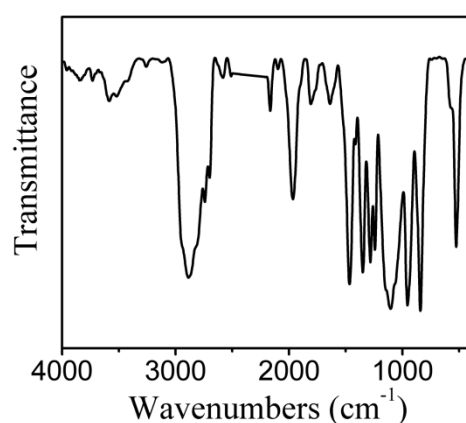

Fig. S1 IR spectrum of PEO.

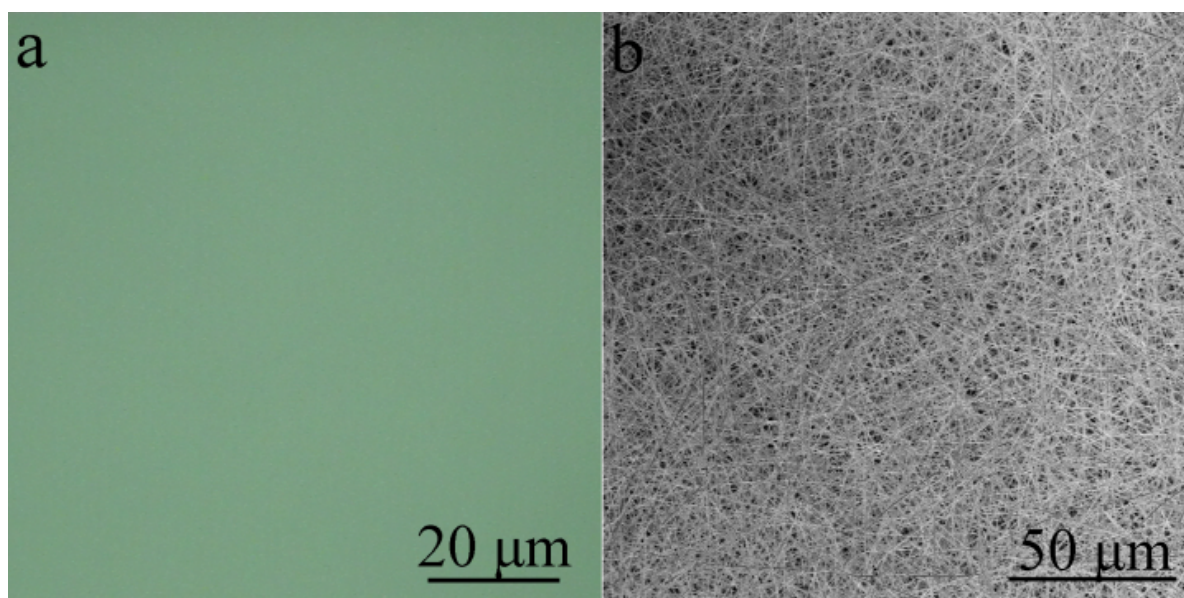

Fig. S2 Optical microscope image (a) and SEM image (b) of the xerogel fibrous membrane after crimping and folding several times.

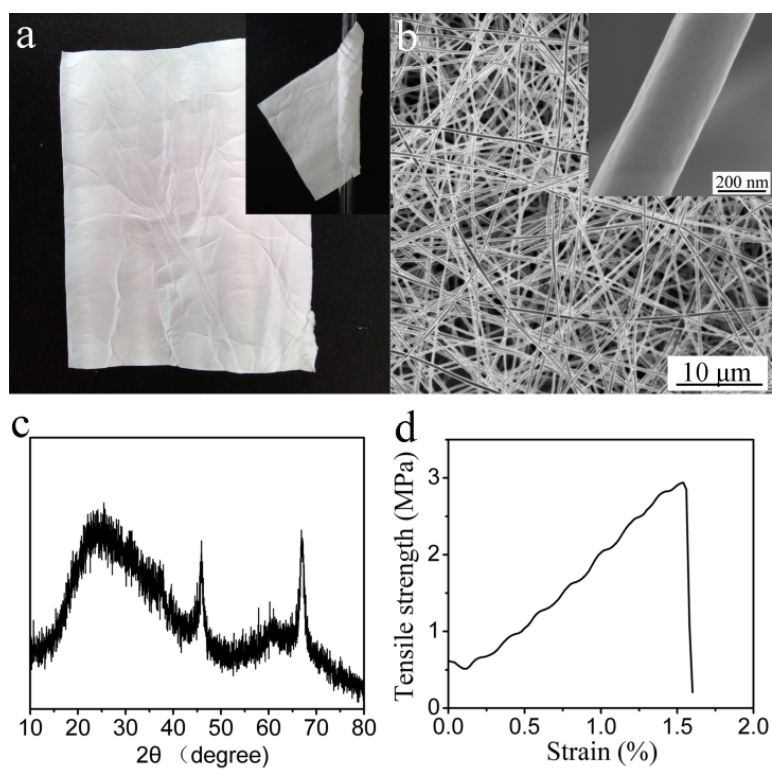

**Fig. S3** Optical images (a), SEM images (b), XRD patterns (c) and tensile stress–strain curves (d) of the membranes that obtained at 700 °C and after kept for eight months.

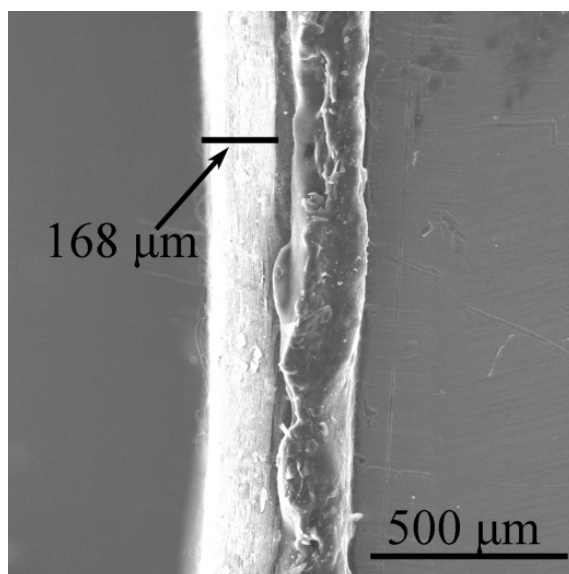

**Fig. S4** Cross-sectional view of the membrane with a basis weight of 9.28 g m<sup>-2</sup>, displaying the thickness of around 168 μm.
